# Supplementary material
Source: PubMed Central journal article supplement (PMC2537437)
Supplement: fj.08-111690_1.pdf [file fj.08-111690_1.pdf]

## SUPPLEMENT

### Figure Legend

#### *Figure S1*

**Biochemical parameters in BHcB mice.** Blood was collected after a 4h fast from TXNIP-deficient C57BL/6.hcb and control C57BL/6 mice and analyzed for **(A)** triglycerides, **(B)** ketones and **(C)** glucose. Bars represent means  $\pm$ SEM,  $n$ =number of mice used per group.

#### *Figure S2*

**Induction of Akt/Bcl-xL signaling in TXNIP-deficient mice.** Pancreata of 12 week-old obese and diabetic BTBR.ob and congenic TXNIP-deficient BTBR.ob/hcb mice were analyzed by immunohistochemistry for **(A)** cleaved caspase-9 and **(B)** Bcl-xL. Isolated islets of C3H and Hcb-19 mice were used for immunoblotting to quantify the expression of **(C)** p-Akt and **(D)** total Akt; bars represent means  $\pm$ SEM, at least 3 independent experiments were performed; insert: representative immunoblot.

**Table S1:**

**Comparison of Weight and Adiposity in 16-week old TXNIP-deficient HcB-19 (HcB) versus Control C3H Mice**

|                               |               | <b>C3H</b><br>means $\pm$ (SEM)<br>(n=15) | <b>HcB</b><br>means $\pm$ (SEM)<br>(n=17) | <b>p-value*</b><br>HcB vs C3H |
|-------------------------------|---------------|-------------------------------------------|-------------------------------------------|-------------------------------|
| <b>WEIGHT (g)</b>             | <b>male</b>   | 23.8 (0.6)                                | 25.6 (0.5)                                | <b>p=0.009</b>                |
|                               | <b>female</b> | 19.9 (0.5)                                | 21.2 (0.5)                                |                               |
| <b>FAT PAD (g)</b>            | <b>male</b>   | 0.31 (0.06)                               | 0.82 (0.05)                               | <b>p&lt;0.001</b>             |
|                               | <b>female</b> | 0.16 (0.06)                               | 0.45 (0.05)                               |                               |
| <b>BODY FAT (%)</b><br>(DEXA) | <b>male</b>   | 20.3 (0.6)                                | 25.5 (0.6)                                | <b>p&lt;0.001</b>             |
|                               | <b>female</b> | 18.7 (0.6)                                | 23.7 (0.5)                                |                               |

\* *calculated by 2-way ANOVA*

*Table S2:*

**Effect of TXNIP Deficiency on Weight and Adiposity in 16-week old Mice on a C57BL/6 (B6) Genetic Background**

---

|                    |               | <b>B6</b><br>means $\pm$ (SEM)<br>(n=10) | <b>B6HcB</b><br>means $\pm$ (SEM)<br>(n=12) | <b>p-value*</b><br>B6HcB vs B6 |
|--------------------|---------------|------------------------------------------|---------------------------------------------|--------------------------------|
| <b>WEIGHT (g)</b>  | <b>male</b>   | 26.8 (0.5)                               | 27.6 (0.6)                                  | <b>p=0.022</b>                 |
|                    | <b>female</b> | 18.9 (0.6)                               | 20.9 (0.4)                                  |                                |
| <b>FAT PAD (g)</b> | <b>male</b>   | 0.30 (0.03)                              | 0.56 (0.04)                                 | <b>p&lt;0.001</b>              |
|                    | <b>female</b> | 0.15 (0.04)                              | 0.27 (0.03)                                 |                                |

---

\* *calculated by 2-way ANOVA*

**Table S3:**

**Serum Insulin and Glucagon**

|                | <b>Insulin (<math>\pm</math>SEM)</b><br>(pmol/L) | <i>p-value</i> | <b>Glucagon (<math>\pm</math>SEM)</b><br>(ng/L) | <i>p-value</i> |
|----------------|--------------------------------------------------|----------------|-------------------------------------------------|----------------|
| <b>C3H</b>     | 117 (24)                                         |                | 47.1 (3.6)                                      |                |
| <b>HcB-19</b>  | 148 (29)                                         | <i>0.444</i>   | 80.1 (8.0)                                      | <i>0.003</i>   |
| <b>B6</b>      | 52 (4)                                           |                | 46.2 (2.7)                                      |                |
| <b>BHcB</b>    | 68 (11)                                          | <i>0.221</i>   | 49.1 (1.8)                                      | <i>0.421</i>   |
| <b>lox/lox</b> | 57 (11)                                          |                | 54.3 (11.6)                                     |                |
| <b>bTKO</b>    | 63 (8)                                           | <i>0.672</i>   | 59.6 (2.1)                                      | <i>0.749</i>   |

*Serum insulin and glucagon concentrations were measured after a 4h fast. Numbers represent means ( $\pm$ SEM) of at least 5 mice per group.*

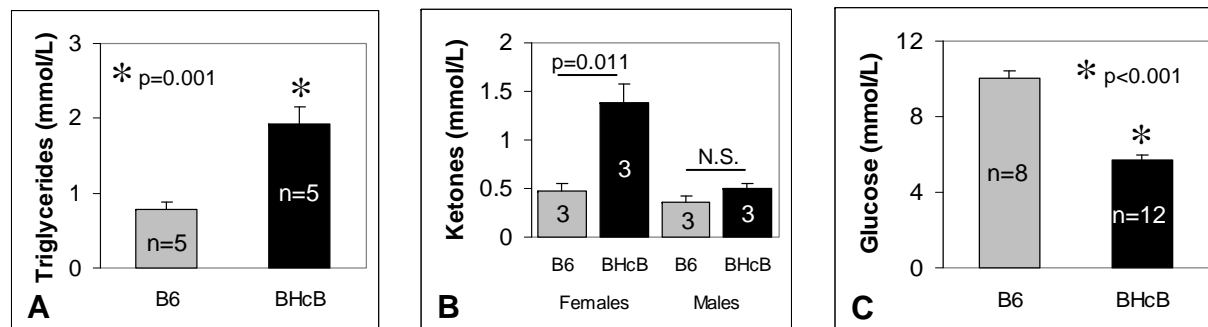

Fig. S1

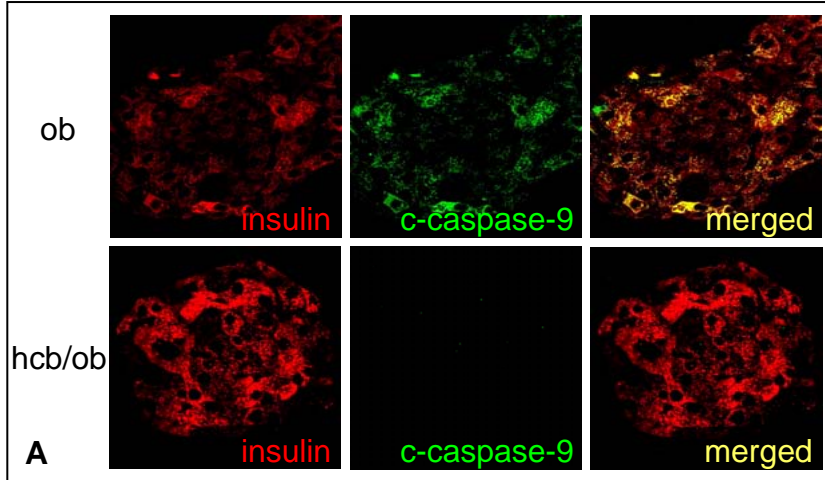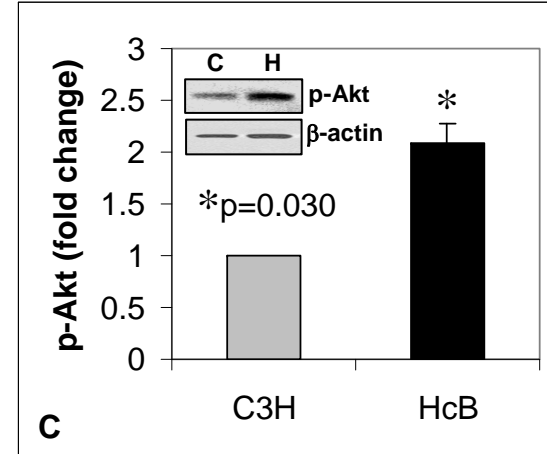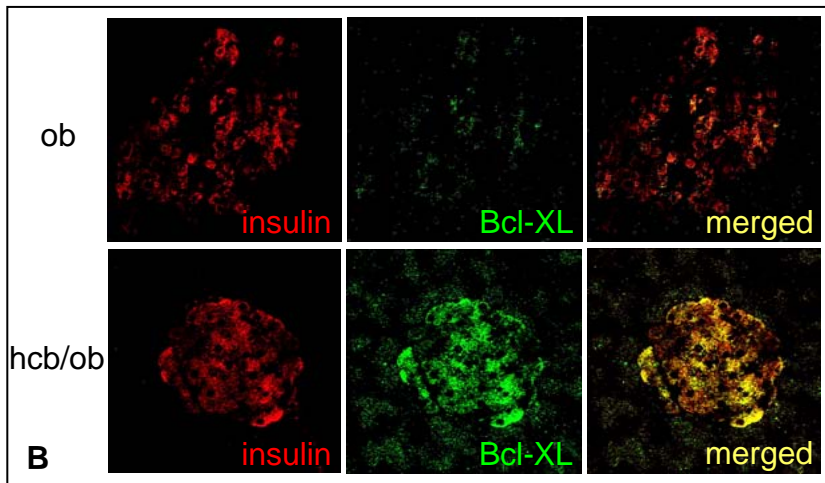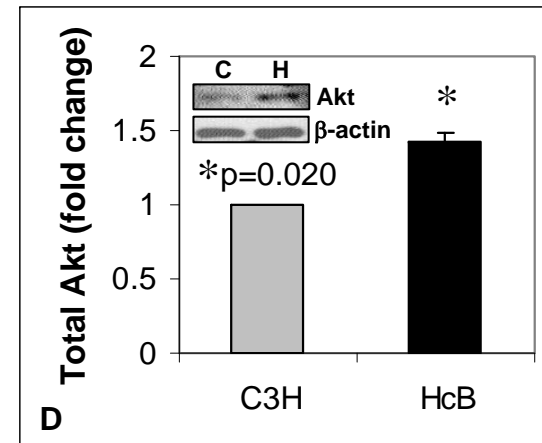

Fig. S2
